# Supplementary material for: Electrical transport properties of microwave-synthesized Bi2Se3−xTex nanosheet
Source: Royal Society of Chemistry journal article supplement (doi:10.1039/c3ce40296g), 2013-01-01
Supplement: c3ce40296g.pdf [file c3ce40296g.pdf]

## Electronic Supplementary Information

### Electrical transport properties of microwave-synthesized $\text{Bi}_2\text{Se}_{3-x}\text{Te}_x$ nanosheet

Haiming Xu, Gang Chen,\* Rencheng Jin, Dahong Chen, Jian Pei and Yu Wang

**Tab. S1** Elemental atomic wt% (EDS) of  $\text{Bi}_2\text{Se}_3$ ,  $\text{Bi}_2\text{Se}_{2.9}\text{Te}_{0.1}$ ,  $\text{Bi}_2\text{Se}_{2.7}\text{Te}_{0.3}$  and  $\text{Bi}_2\text{Se}_{2.5}\text{Te}_{0.5}$  single crystals.

| Sample<br>(Precursor-ratio)                 | EDS<br>composition                            | Bi    | Se    | Te  |
|---------------------------------------------|-----------------------------------------------|-------|-------|-----|
| $\text{Bi}_2\text{Se}_3$                    | $\text{Bi}_2\text{Se}_3$                      | 39.95 | 59.96 | 0   |
| $\text{Bi}_2\text{Se}_{2.9}\text{Te}_{0.1}$ | $\text{Bi}_2\text{Se}_{2.94}\text{Te}_{0.06}$ | 39.8  | 58.9  | 1.1 |
| $\text{Bi}_2\text{Se}_{2.7}\text{Te}_{0.3}$ | $\text{Bi}_2\text{Se}_{2.86}\text{Te}_{0.14}$ | 39.7  | 57.1  | 2.8 |
| $\text{Bi}_2\text{Se}_{2.5}\text{Te}_{0.5}$ | $\text{Bi}_2\text{Se}_{2.73}\text{Te}_{0.27}$ | 39.9  | 54.5  | 5.3 |

**Tab. S2** Experimental conditions and electrical transport properties of pure  $\text{Bi}_2\text{Se}_3$  at 298 K used in this study.

| Pressure<br>(Mpa) | Sintered<br>time<br>(s) | Electrical<br>conductivity<br>( $\text{S}\cdot\text{m}^{-1}$ ) | Seebeck<br>coefficient<br>( $\mu\text{V}\cdot\text{K}^{-1}$ ) | Power<br>factor<br>( $\text{W}\cdot\text{m}^{-1}\cdot\text{K}^{-2}$ ) |
|-------------------|-------------------------|----------------------------------------------------------------|---------------------------------------------------------------|-----------------------------------------------------------------------|
| 20                | –                       | 106                                                            | -118                                                          | $0.15 \times 10^{-5}$                                                 |
| 20                | 6                       | 433                                                            | -120                                                          | $0.62 \times 10^{-5}$                                                 |
| 20                | 12                      | 416                                                            | -121                                                          | $0.61 \times 10^{-5}$                                                 |
| 20                | 18                      | 423                                                            | -120                                                          | $0.61 \times 10^{-5}$                                                 |
| 10                | –                       | 79                                                             | -118                                                          | $0.11 \times 10^{-5}$                                                 |
| 10                | 6                       | 385                                                            | -119                                                          | $0.55 \times 10^{-5}$                                                 |
| 10                | 12                      | 382                                                            | -120                                                          | $0.55 \times 10^{-5}$                                                 |
| 10                | 18                      | 390                                                            | -120                                                          | $0.56 \times 10^{-5}$                                                 |

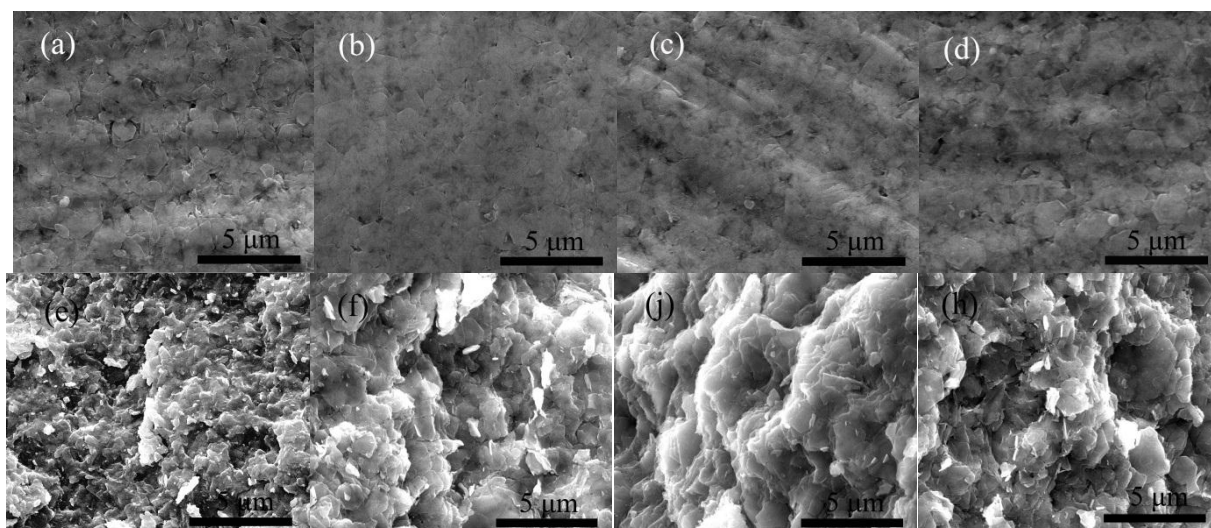

**Fig. S1** Surfaces and fractured surfaces of (a, e) green compact, (b, f) 6 s sintered, (c, j) 12 s sintered and (d, h) 18s sintered observed by FESEM, showing the influence of the microwave sintering and/or pressure on the microstructure of  $\text{Bi}_2\text{Se}_3$ , in the case of a high pressure (20 Mpa).

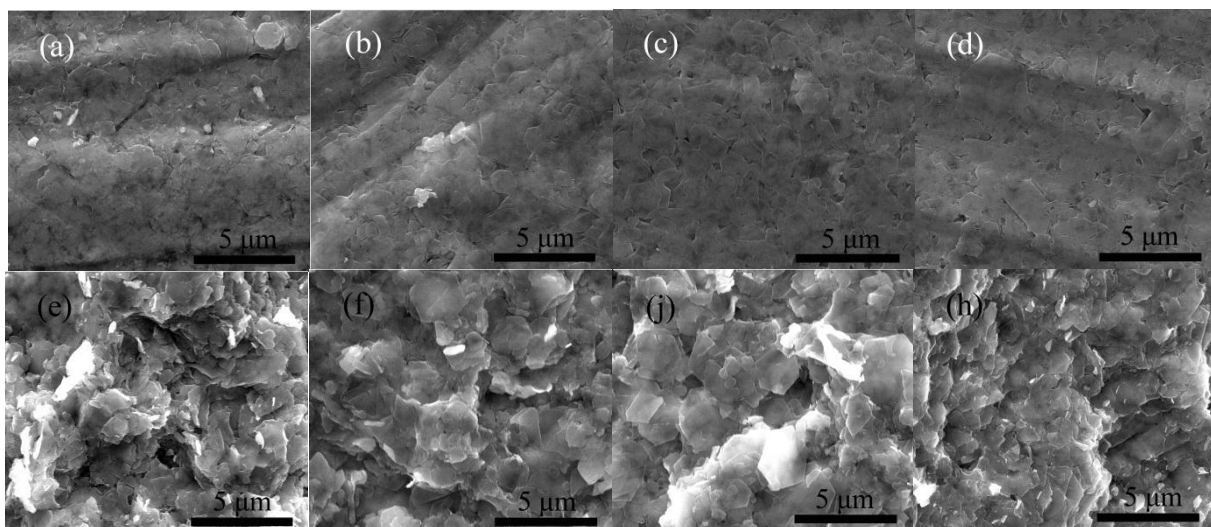

**Fig. S2** Surfaces and fractured surfaces of (a, e) green compact, (b, f) 6 s sintered, (c, j) 12 s sintered and (d, h) 18s sintered observed by FESEM, showing the influence of the microwave sintering and/or pressure on the microstructure of  $\text{Bi}_2\text{Se}_3$ , in the case of a pressure (10 Mpa).

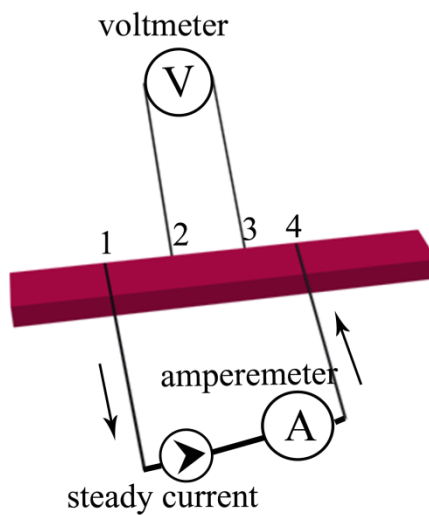

**Fig. S3** Schematic diagram of four-probe method for measuring the sample's conductivity.
